# Supplementary material for: Insecticide Resistance in the Dengue Vector Aedes aegypti from Martinique: Distribution, Mechanisms and Relations with Environmental Factors
Source: PLoS One. 2012 Feb 21;7(2):e30989. doi: 10.1371/journal.pone.0030989 (PMC3283601; doi:10.1371/journal.pone.0030989)
Supplement: Information S2 — Detailed PCA analysis. (XLS) [file pone.0030989.s002.xls]

## Sheet: Suppl Table 2
	Supplementary table 2. Detailed PCA analysis										Detailed results of PCA analysis with larval gene transcription levels
											Representation of information on PCA axis
	Axis	% information	Sum % information									Axis	Information (%)	Sum (%)
	1	24.18	24.18									1	33	33
	2	21.7148	45.8948									2	27	60
	3	17.3854	63.2801									3	15	75
	4	13.8608	77.1409									4	14	89
	5	9.81789	86.9588									5	6	95
	6	6.2069	93.1657									6	3	97
	7	4.35277	97.5185									7	2	99
	8	2.4815	100									8	1	100
	Variable	Cos2				Contribution
		Axis 1	Axis 2	Axis 3	Axis 4	Axis 1	Axis 2	Axis 3	Axis 4		Contribution of variables in the definition of axes
	CYP6M11_Lv	-0.4694	-0.1473	-0.2312	0.0108	6.69	2.34	4.59	0.27			Variable	Cos2 (%)			Contribution (%)
	CYP6Z6_Lv	-0.5093	-0.0068	0.0014	-0.2557	7.26	0.11	0.03	6.36				axis 1	axis 2	axis 3	axis 1	axis 2	Axis 3
	CYP6Z8_Lv	-0.4994	0.0833	0.0016	-0.1065	7.12	1.32	0.03	2.65			CYP6M11	49	-33	-8	7	6	3
	CYP9J22_Lv	0.4575	-0.0606	0.0093	0.1335	6.52	0.96	0.18	3.32			CYP6Z6	49	0	1	7	0	0
	CYP9M9_Lv	-0.2611	-0.4041	-0.1042	0.1495	3.72	6.42	2.07	3.72			CYP6Z8	49	12	-1	7	2	0
	CPR_Lv	0.6483	0	0.083	-0.218	9.25	0	1.65	5.42			CYP9J22	-39	-4	0	6	1	0
	CCEae3A_Lv	-0.2661	-0.3777	-0.1467	-0.1053	3.8	6	2.91	2.62			CYP9M9	28	-62	0	4	11	0
	GSTE2_Lv	-0.8946	0.0127	-0.0225	0.0615	12.76	0.2	0.45	1.53			CPR	-68	6	6	10	1	2
	GSTE7_Lv	-0.7066	0	-0.0459	0.2067	10.08	0	0.91	5.14			CCEae3A	24	-40	0	4	7	0
	CYP6M11_Ad	0.0376	-0.0707	0.0092	-0.1581	0.54	1.12	0.18	3.93			GSTe2	93	0	-4	14	0	1
	CYP6Z6_Ad	-0.0261	-0.3005	0.3856	-0.0038	0.37	4.77	7.65	0.09			GSTe7	75	-4	-7	11	1	2
	CYP6Z8_Ad	-0.1555	0.1211	-0.44	-0.1727	2.22	1.92	8.73	4.3			V1016I	51	27	1	8	5	0
	CYP9J22_Ad	-0.1971	-0.4014	0.1174	-0.1585	2.81	6.37	2.33	3.94			RR50_delta	1	44	-28	0	8	9
	CYP9M9_Ad	-0.0064	0.2947	-0.2391	-0.1635	0.09	4.68	4.74	4.07			Alive_24h_delta	-3	29	-56	0	5	18
	CPR_Ad	-0.0035	0.0007	0.0545	-0.0716	0.05	0.01	1.08	1.78			RR50_tem	23	-5	28	3	1	9
	CCEae3A_Ad	0.0091	-0.3629	-0.1156	-0.4921	0.13	5.76	2.29	12.24			Pulverizations	33	9	-3	5	2	1
	GSTE2_Ad	-0.0269	0.0217	-0.0079	-0.0122	0.38	0.35	0.16	0.3			Interventions	13	11	54	2	2	18
	GSTE7_Ad	-0.001	0.1048	-0.2514	0.0157	0.01	1.66	4.99	0.39			Urbanization	36	25	-11	5	5	4
	V1016I	-0.5444	0.1251	0.0642	-0.1235	7.76	1.99	1.27	3.07			Agriculture	-2	-93	-3	0	17	1
	RR50_delta	-0.014	0.5267	-0.0339	-0.2485	0.2	8.36	0.67	6.18			Bananas	-13	-37	-37	2	7	12
	Alive_24_delta	0.0357	0.5873	-0.1451	-0.0314	0.51	9.33	2.88	0.78			Sugar_cane	5	-63	24	1	12	8
	RR50_tem	-0.283	-0.2333	0.0229	-0.2756	4.04	3.71	0.45	6.86			OCPs_risk	-6	-37	-32	1	7	10
	Pulv	-0.2598	0.1761	0.0369	0.4528	3.7	2.8	0.73	11.27
	Int	-0.1612	-0.0044	0.5385	-0.0237	2.3	0.07	10.68	0.59			Cos² (%): Cos² gives the quality of the representation of variables along each axis.
	Urb	-0.3096	0.4821	0.0018	0.1748	4.42	7.66	0.04	4.35			Contribution (%): Represents the contribution of a variable to the definition of each axis.
	Agri	0.0135	-0.5288	-0.3895	0.0508	0.19	8.4	7.73	1.26
	Ban	0.1146	-0.0549	-0.7685	0.0006	1.63	0.87	15.24	0.02
	Sug	-0.0567	-0.7476	0.0074	0.1404	0.81	11.87	0.15	3.49
	OCP_Risk	0.0442	-0.06	-0.7666	-0.0019	0.63	0.95	15.2	0.05		Detailed resutls of PCA analysis with adult gene transcription levels
	Graphical representation of variables										Representation of information on PCA axis
												Axis	Information (%)	Sum (%)
												1	28	28
												2	24	52
												3	16	68
												4	12	80
												5	9	89
												6	6	94
												7	4	98
												8	2	100
											Contribution of variables in the definition of axes
												Variable	Cos² (%)			Contribution (%)
													axis 1	axis 2	axis 3	axis 1	axis 2	axis 3
												CYP6M11	8	3	20	1	1	6
												CYP6Z6	60	-9	1	11	2	0
												CYP6Z8	-34	4	26	6	1	8
												CYP9J22	63	-1	32	11	0	10
												CYP9M9	-50	1	7	9	0	2
												CPR	1	-4	-1	0	1	0
												CCEae3A	12	42	21	2	9	7
												GSTe2	0	0	46	0	0	15
												GSTe7	-21	5	15	4	1	5
												V1016I	-1	-41	52	0	8	16
												RR50_delta	-53	-5	17	9	1	5
												Alive_24h_delta	-76	0	2	14	0	1
												RR50_tem	33	0	37	6	0	12
												Pulverizations	-6	-43	-6	1	9	2
												Interventions	26	-44	18	5	9	6
												Urbanization	-29	-43	-1	5	9	0
												Agriculture	9	72	-2	2	15	1
												Bananas	-6	86	1	1	18	0
												Sugar_cane	66	4	-3	12	1	1
												OCPs_risk	-4	77	6	1	16	2
												Cos² (%): Cos² gives the quality of the representation of variables along each axis.
												Contribution (%): Represents the contribution of a variable to the definition of each axis.
